# Supplementary material for: Canavanine-Induced Decrease in Nitric Oxide Synthesis Alters Activity of Antioxidant System but Does Not Impact S-Nitrosoglutathione Catabolism in Tomato Roots
Source: PubMed Central journal article supplement (PMC6763595; doi:10.3389/fpls.2019.01077), 2019-09-20
Supplement: DataSheet_1.pdf [file DataSheet_1.pdf]

**Table S1.** List of the primers used for RT-qPCR experiments

| Gene name                     | Gene ID (NCBI) | Primers sequences 5'-3'                                 | PCR product length (bp) |
|-------------------------------|----------------|---------------------------------------------------------|-------------------------|
| <i>CAT1</i>                   | 543990         | F: TCCCAGTTAATGCTCCCAAG<br>R: ACCTCGAGGGCAAATAATCC      | 102                     |
| <i>CAT2</i>                   | 543585         | F: ATCCTCGTGGTTTTGCTGTC<br>R: TGAAGAAGACGGGGAAGTTG      | 81                      |
| <i>CAT3</i>                   | 101259333      | F: ACAAAGCTGGGAAAGCACAG<br>R: TCCTTGGTGGCATGACTATG      | 121                     |
| <i>MNSOD</i>                  | 101256386      | F: CAGAAGGTGCTGCTTTACAGG<br>R: AAGGGTCTGATTTGCAGTG      | 99                      |
| <i>CUSOD2</i>                 | 101264296      | F: GCAATCCAATGGTGTACCC<br>R: ATGGAAAGCGTGAAGACCTG       | 70                      |
| <i>FESOD</i>                  | 544259         | F: TAACAATGGTGTCCCTTC<br>R: CGTTGGGCTTCATAGATTCC        | 86                      |
| <i>SODCP.2</i>                | 543981         | F: AATGTTGAGGGGGTTGTCAC<br>R: ATGAAACCCGTGAAGTCCAG      | 99                      |
| <i>SOD3</i>                   | 101256231      | F: ACACCTGCTAAGCCAAAACC<br>R: CCAATGGCTGCTACAAATCC      | 116                     |
| <i>GPXle-1</i>                | 544197         | F: AAATGGTCTGCACTCGCTTC<br>R: CTCCAAAGAACCCACCTTTG      | 120                     |
| <i>GPXle-2</i>                | 101267098      | F: GGATGCAAAGGGAAATGATG<br>R: GACGCAACATTCACGATCAG      | 72                      |
| <i>GPx</i>                    | 544261         | F: GATGTGAACGGGGATAATGC<br>R: ACAGCACTTCCAAGGAAACC      | 77                      |
| <i>pGPx8</i>                  | 101267388      | F: CGCGACAGGAAATGATGTAG<br>R: GTTAGTCATCCCGCATTTGG      | 88                      |
| <i>GSHPx1</i>                 | 101267727      | F: ACTATCACTGCCCAAACCTCTC<br>R: TAAAGCAACCGAGAGAGAGACC  | 94                      |
| <i>GSHPx2</i>                 | 101248896      | F: TGACAAGGTGACGTGAATG<br>R: CACCTAAAAATCCTCCTGCAC      | 80                      |
| <i>GR</i>                     | 100301931      | F: CTCCTCGGCATTACGATTTTC<br>R: CTCACAAACAGCAACCGAAG     | 107                     |
| <i>GRI</i>                    | 100301935      | F: CGAGCTAGTCGGTTTTTCAGC<br>R: CCCATAGGCTGCTCCATAAA     | 159                     |
| <i>GSNOR</i>                  | 100750249      | F: CTGGAGTGGGAGTTATGATGAA<br>R: CCTCCGCCACAGCAAGACCAACT | 279                     |
| <i>EF1<math>\alpha</math></i> | 101244084      | F: GGTCAATCATCATGAACCATCC<br>R: CATACCAGCATCACCGTTCTT   | 175                     |
| <i>PP2Acs</i>                 | 001247587.2    | F: CGATGTGTGATCTCCTATGGTC<br>R: AAGCTGATGGGCTCTAGAAATC  | 149                     |

**Table S2.** Details of MALDI MS/MS identification after trypsin in-gel digestion of the nitrated proteins of tomato roots treated with CAN (10, 50  $\mu$ M) for 24 or 72 h. Scores and threshold for significant homology or identity by MASCOT MS/MS Ions Search (Matrix-Science)

|                   | Culture period (h) | Protein band (Fig. S4) | Description                                            | NCBI ID        | Number of identified peptides | Score of identified peptides (in parenthesis) | Significant homology or identity         |
|-------------------|--------------------|------------------------|--------------------------------------------------------|----------------|-------------------------------|-----------------------------------------------|------------------------------------------|
| CAN<br>10 $\mu$ M | 24                 | a                      | Luminal-binding protein 5                              | XP_004234985.1 | 3                             | 1 (39)<br>2 (64)<br>3 (64)                    | >36<br>>56<br>>34                        |
|                   |                    | b                      | Phosphoglycerate kinase, chloroplastic                 | XP_004243968.1 | 2                             | 1 (33)<br>2 (59)                              | >29<br>>57                               |
|                   |                    | c                      | 11s globulin seed storage protein 2-like<br>(fragment) | XP_004247523.1 | 3                             | 1 (66)<br>2 (56)<br>3 (49)                    | >57<br>>46<br>>39                        |
|                   |                    | d                      | 12s seed storage protein CRA1-like<br>(fragment)       | XP_004246943.1 | 2                             | 1 (61)<br>2 (39)                              | >37<br>>37                               |
|                   | 72                 | e                      | Polyphenol oxidase D, chloroplastic                    | NP_001334885.1 | 4                             | 1 (31)<br>2 (31)<br>3 (49)<br>4 (57)          | >21<br>>25<br>>21<br>>20                 |
|                   |                    | f                      | Prohibitin-3 mitochondrial                             | XP_004250114.1 | 3                             | 1 (62)<br>2 (35)<br>3 (41)                    | >56<br>>21<br>>36                        |
|                   |                    | g                      | Monodehydroascorbate reductase                         | NP_001318117.1 | 4                             | 1 (38)<br>2 (69)<br>3 (43)<br>4 (36)          | >45<br>>57<br>>39<br>>35                 |
|                   |                    | h                      | Phosphoglycerate kinase, chloroplastic                 | XP_004243968.1 | 2                             | 1 (62)<br>2 (47)                              | >33<br>>46                               |
| CAN<br>50 $\mu$ M | 24                 | i                      | Aconitate hydratase, cytoplasmic                       | XP_004251517.2 | 3                             | 1 (75)<br>2 (34)<br>3 (52)                    | <u><math>\geq</math>70</u><br>>23<br>>41 |
|                   |                    | j                      | Luminal-binding protein 5                              | XP_004234985.1 | 2                             | 1 (39)<br>2 (64)                              | >36<br>>56                               |
|                   |                    | k                      | Phosphoglycerate kinase. chloroplastic                 | XP_004243968.1 | 2                             | 1 (33)                                        | >29                                      |

|  |    |   |                                                        |                 |   |                                      |                                 |
|--|----|---|--------------------------------------------------------|-----------------|---|--------------------------------------|---------------------------------|
|  |    |   |                                                        |                 |   | 2 (59)                               | <u>≥57</u>                      |
|  |    | l | Vivilin precursor (fragment)                           | NP_001308118.1  | 2 | 1 (54)<br>2 (82)                     | >47<br><u>≥70</u>               |
|  |    | m | Prohibitin-1, mitochondrial-like                       | XP_004251498.1  | 4 | 1 (87)<br>2 (43)<br>3 (57)<br>4 (26) | <u>≥69</u><br>>39<br>>34<br>>38 |
|  |    | n | 11s globulin seed storage protein 2-like<br>(fragment) | XP_004247523.1  | 3 | 1 (57)<br>2 (55)<br>3 (41)           | >36<br>>46<br>>39               |
|  |    | o | 12s seed storage protein CRA1-like<br>(fragment)       | XP_004246943.1  | 2 | 1 (61)<br>2 (39)                     | >37<br>>37                      |
|  | 72 | p | Peroxidase 3-like                                      | XP_006367274.1  | 2 | 1 (57)<br>2 (23)                     | >55<br>>18                      |
|  |    | r | Polyphenol oxidase D, chloroplastic                    | NP_001334885.18 | 3 | 1 (23)<br>2 (41)<br>3 (48)           | >21<br>>20<br><u>≥46</u>        |
|  |    | s | Monodehydroascorbate reductase                         | NP_001318117.1  | 4 | 1 (40)<br>2 (44)<br>3 (69)<br>4 (40) | >45<br>>33<br><u>≥57</u><br>>45 |
|  |    | t | Phosphoglycerate kinase, chloroplastic                 | XP_004243968.1  | 3 | 1 (59)<br>2 (21)<br>3 (64)           | <u>≥57</u><br>>20<br>>53        |

## Monodehydroascorbate reductase (MDAR) activity

### Method - determination of MDAR activity in roots extracts

Activity of MDAR was measured according to Hossain et al. (1984) with some modifications by Leterrier (2005). Root were homogenized in an ice bath with 50 mM Tris-HCl pH 7.8, 10% (w/v) glycerol, 5 mM DTT, 0.2% Triton X-100 mM, 1% (v/v) protease inhibitor cocktail (Sigma-Aldrich), 5% (w/v) PVPP and centrifuged at 10,000 g 15 min. The collected supernatant was concentrated by PES, 3K MWCO (Thermo Scientific™) at 10,000 g for 30 min. An assay mixture (250 µl) contained: 25 µl of protein extract, 0.2 mM NADH and 1 mM NADH in 50 mM Tris-HCl pH 7.6. The reaction was started by an addition of 0.2 U of ascorbate oxidase (A0157 Sigma-Aldrich). MDAR activity was measured as absorbance decrease at 340 nm for 3 min at 25°C, using a microplate reader (Sunrise, Tecan). An activity was calculated using the extinction coefficient  $\epsilon = 6.22 \text{ mM}^{-1} \text{ cm}^{-1}$  and expressed as  $\text{nmol min}^{-1} \text{ mg}^{-1} \text{ protein}$ .

### Result

Activity of MDAR in control tomato roots growing in water increased as the culture period was prolonged. In roots of CAN supplemented seedlings MDAR activity was lower than in control. After 24 h MDAR activity was inhibited in 20% by 50 µM CAN, whereas after 72 h inhibition was 30% and 50 % after 10 and 50 µM CAN application respectively.

**Table S3.** Activity of MDAR in extracts from roots of the control seedlings grown in water and roots of seedlings treated with CAN (10, 50 µM) for 24 and 72 h. Values are average  $\pm$ SD of 3-4 repetitions. Asterisks (\*) indicate significance between treatments and the control at the same time of culture period at  $P \leq 0.05$ , based on Student's test

| Plant treatment | MDAR activity<br>(nmol NADH min <sup>-1</sup> mg <sup>-1</sup> protein) |                    |
|-----------------|-------------------------------------------------------------------------|--------------------|
|                 | 24 h                                                                    | 72 h               |
| Control (water) | 0.061 $\pm$ 0.004                                                       | 0.074 $\pm$ 0.005  |
| CAN 10 µM       | 0.056 $\pm$ 0.003                                                       | 0.052 $\pm$ 0.003* |
| CAN 50 µM       | 0.048 $\pm$ 0.003*                                                      | 0.037 $\pm$ 0.004* |

Hossain, M. A., Nakano, Y., and Asada, K. (1984). Monodehydroascorbate reductase in spinach chloroplasts and its participation in regeneration of ascorbate for scavenging hydrogen peroxide. *Plant Cell Physiol.* 25, 385–395. doi:10.1093/oxfordjournals.pcp.a076726.

Leterrier, M. (2005). Peroxisomal monodehydroascorbate reductase. Genomic clone characterization and functional analysis under environmental stress conditions. *Plant Physiol.* 138, 2111–2123. doi:10.1104/pp.105.066225.

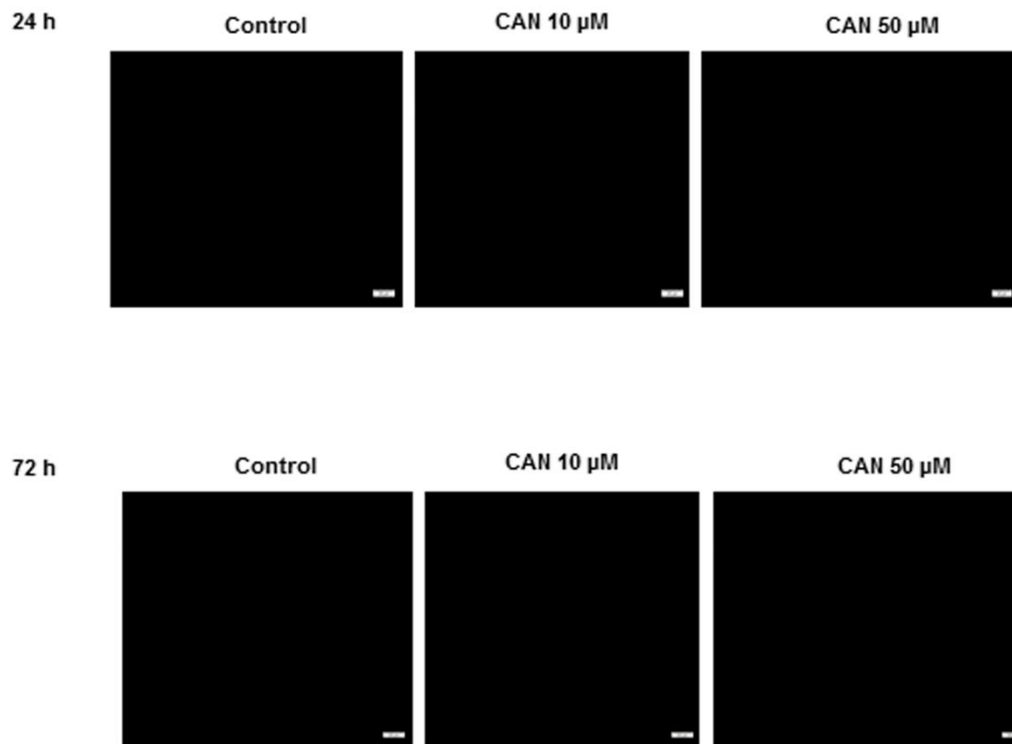

**Fig. S1.** Visualization of GSNO-related red fluorescence signal in root apex of tomato seedlings. Controls for background staining performed by replacing the primary antibody with the incubation buffer. Scale bars 20  $\mu\text{m}$ .

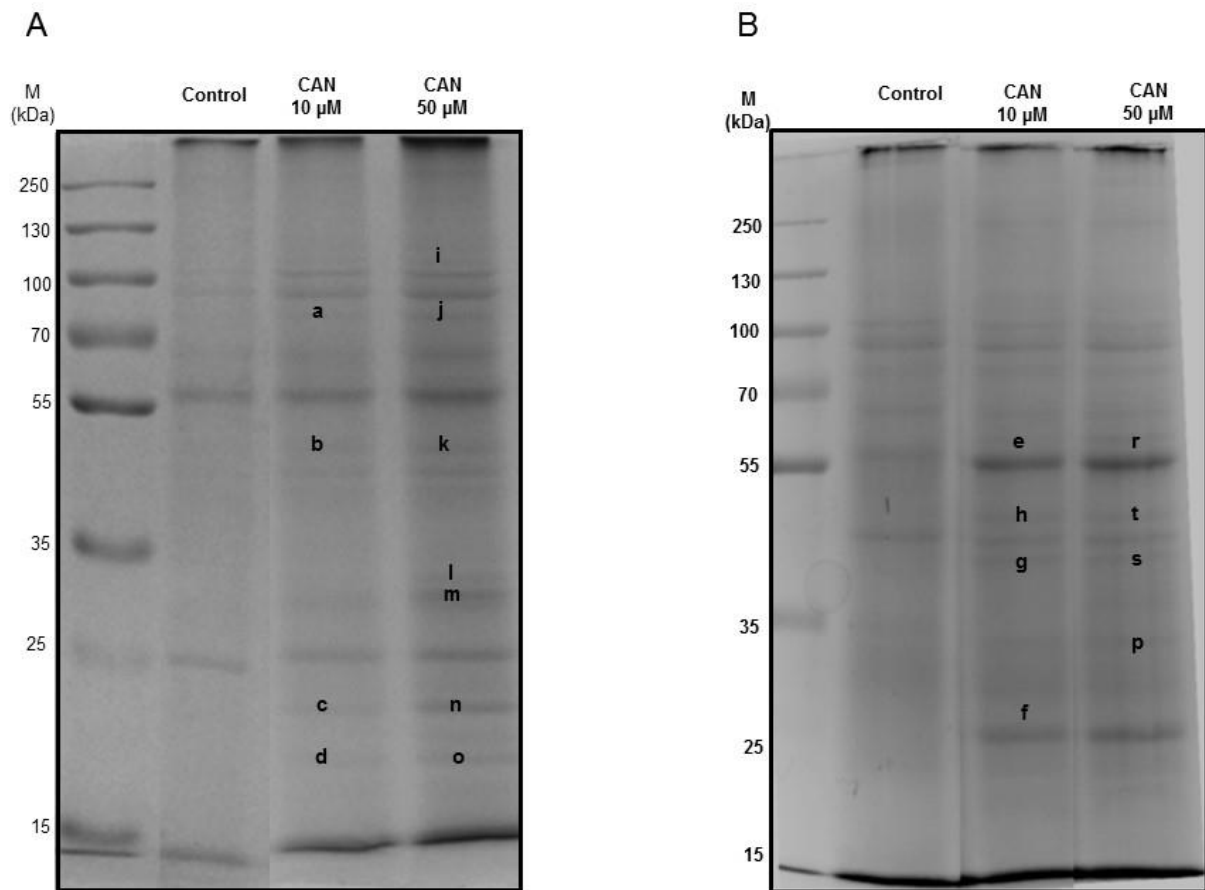

**Fig. S2.** Pattern of 3-NT modified proteins (after immunoprecipitation) in extract of tomato roots after 24 h (A) or 72 h (B) of the culture. Control - plants growing in water, CAN 10  $\mu\text{M}$  - seedlings treated with 10  $\mu\text{M}$  CAN, CAN 50  $\mu\text{M}$  - seedlings treated with 50  $\mu\text{M}$  CAN. Molecular standard (M) in kDa are indicated on the left side. Gels were stained with Coomassie. Protein bands indicated by small letters (a-t) (Table S2) were cut out and identified by MALDI MS/MS (Table 3).

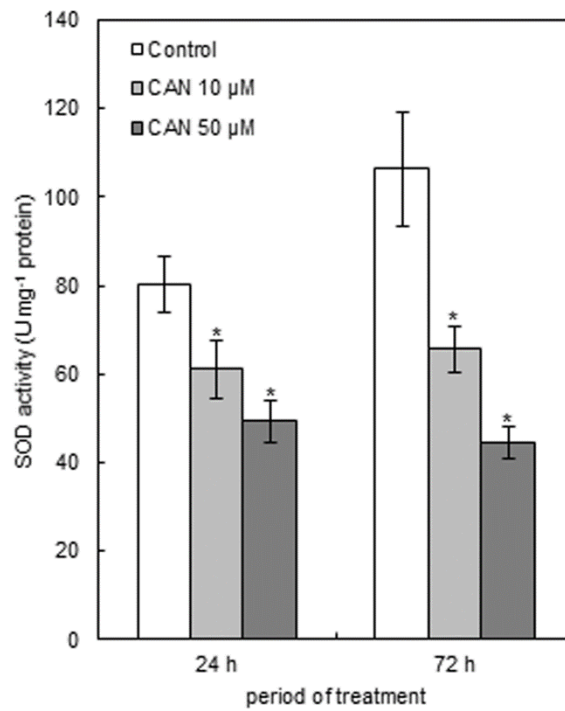

**Fig. S3.** Activity of SOD in extracts from roots of the control seedlings growing in water and roots of seedlings treated with CAN (10, 50  $\mu\text{M}$ ) for 24 and 72 h. Values are average  $\pm$  SD of at least 3 independent experiments and 3 biological repetitions each. Asterisks (\*) indicate significance between treatments and the control at the same time of culture period at  $P \leq 0.05$ , based on Student's test.

## Supplementary material

**A**

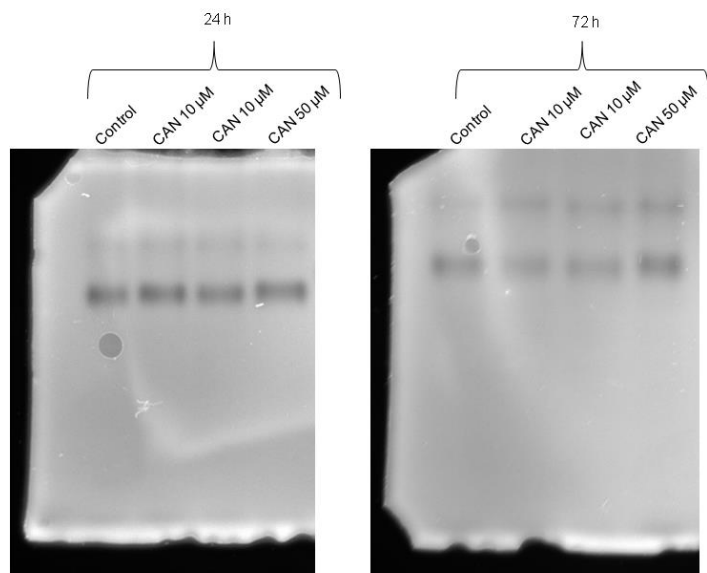

**B**

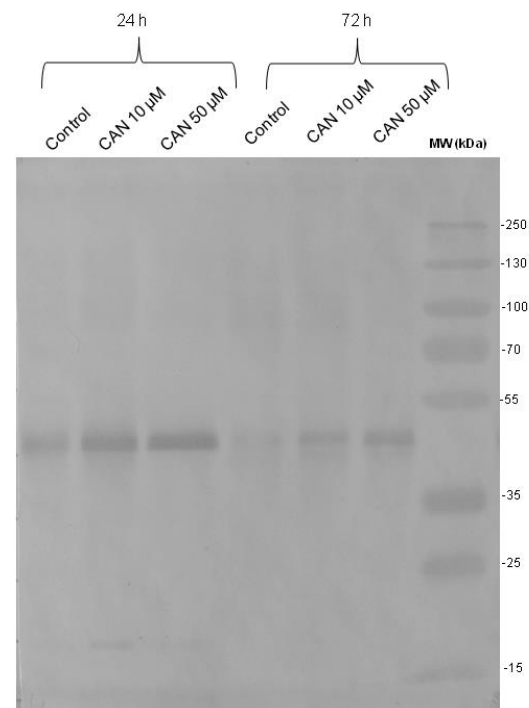

Original images for the gel Fig.5B in the manuscript (A) and the blot Fig.5C in the manuscript (B).

PageRuler™ Plus Prestained Protein Ladder (Thermo Scientific™, 26620) was used (B).
